# Supplementary material
Source: HighWire-hosted journal article supplement (https://erj.ersjournals.com/content/52/4/1701994)
Supplement: inline-supplementary-material-2 [file inline-supplementary-material-2.pdf]

Table E1

| Fanconi Anemia |          | Translesion Synthesis |          | Homologous Recombination |          | Mismatch Repair |          | Base Excision Repair |          | Non-Homologous End Joining |          | Chromatin Remodeling |           | Nucleotide Excision Repair |          | Direct Repair |        | Telomere Repair |         |
|----------------|----------|-----------------------|----------|--------------------------|----------|-----------------|----------|----------------------|----------|----------------------------|----------|----------------------|-----------|----------------------------|----------|---------------|--------|-----------------|---------|
| Entrez ID      | Symbol   | Entrez ID             | Symbol   | Entrez ID                | Symbol   | Entrez ID       | Symbol   | Entrez ID            | Symbol   | Entrez ID                  | Symbol   | Entrez ID            | Symbol    | Entrez ID                  | Symbol   | Entrez ID     | Symbol | Entrez ID       | Symbol  |
| 6233           | RPS27A   | 6233                  | RPS27A   | 10215                    | PSMD14   | 3978            | LIG1     | 328                  | APEX1    | 10215                      | PSMD14   | 80                   | ACTB      | 6233                       | RPS27A   | 4255          | MGMT   | 80119           | PIF1    |
| 7311           | UBA52    | 7311                  | UBA52    | 472                      | ATM      | 5424            | POLD1    | 27301                | APEX2    | 472                        | ATM      | 86                   | ACTL8A    | 7311                       | UBA52    | 121642        | ALKBH2 | 23049           | SMG1    |
| 378708         | GENPS    | 199990                | FAAP20   | 641                      | BLM      | 5425            | POLD2    | 3978                 | LIG1     | 64421                      | DLCLRE1C | 51412                | ACTL8B    | 9716                       | AQR      | 2211620       | ALKBH3 | 23293           | SMG6    |
| 8416           | ATRIP    | 201973                | PRIMPOL  | 8416                     | SLX4     | 10714           | POLD3    | 3968                 | LIG3     | 7578                       | BRCC3    | 57193                | ACTR3B    | 5478                       | RNF138   | 54784         | ALKBH5 | 79991           | OBFC1   |
| 84464          | SLX4     | 5424                  | POLD1    | 672                      | BRCA1    | 57804           | POLD4    | 5423                 | POLB     | 9577                       | BRE      | 79913                | ACTR5     | 54841                      | BIVM     | 10973         | ASCC3  | 54386           | TERF2IP |
| 199990         | FAAP20   | 5425                  | POLD2    | 675                      | BRCA2    | 2067            | ERC1C    | 5424                 | POLD1    | 580                        | BARO1    | 64431                | ACTR6     | 84464                      | SLX4     | 51008         | ASCC1  | 5976            | UPF1    |
| 353497         | CORT     | 10714                 | POLD3    | 116392                   | SFR1     | 9156            | EXO1     | 5426                 | POLE     | 472                        | BRCA1    | 8289                 | ARID1A    | 675                        | BRCA1    | 79088         | FTO    | 7013            | TERF1   |
| 2067           | ERC1C    | 11201                 | POL1     | 128074                   | SWI5     | 4436            | MSH2     | 2074                 | ERCHE1   | 3981                       | NHEJ1    | 22893                | ARID2     | 19628                      | CCND2    | 84164         | ASCC2  | 7014            | TERF2   |
| 64789          | EXOS     | 5427                  | POL2E    | AP5S1                    | 55317    | 4292            | MLH1     | 10721                | POLQ     | 286257                     | Ctbfat12 | 29028                | ATA2D     | 1022                       | CDK7     |               |        | 5884            | RAD17   |
| 353497         | POLN     | 5429                  | POLH     | 253714                   | MM52L    | 27030           | MLH3     | 1763                 | DNA2     | 84142                      | FAM175A  | 546                  | ATRX      | 4331                       | MNAT1    |               |        | 1017            | CDK2    |
| 2067           | ERC1C    | 11201                 | POL1     | 3745757                  | MSH6     | 4436            | MSH4     | 2237                 | FEN1     | 3978                       | NHEJ1    | 22893                | ARID2     | 19628                      | CCND2    |               |        | 10728           | PTGES3  |
| 91442          | FAAP2A   | 51426                 | POLN     | 8318                     | CDC45    | 4437            | MSH3     | 267004               | PGBD3    | 64858                      | DLCLRE1B | 11176                | BAZ2A     | 9557                       | CHD1L    |               |        | 1736            | DKC1    |
| 2175           | FANCA    | 353497                | POLN     | 8317                     | CDK7     | 4438            | MSH4     | 2237                 | FEN1     | 3978                       | BRD4     | 23476                | GP51      | 2873                       | GP51     |               |        | 5558            | PRIM2   |
| 2187           | FANCB    | 5980                  | REV3L    | 135458                   | HUS1B    | 4439            | MSH5     | 3146                 | HMOB1    | 3980                       | LIG3     | 2186                 | BPTF      | 1069                       | CETN2    |               |        | 5557            | PRIM1   |
| 2176           | FANCC    | 51514                 | DTL      | 11144                    | MSH6     | 2956            | MSH6     | 8091                 | HMO2A    | 3981                       | LIG4     | 25855                | HUS1B     | 135458                     | HUS1B    |               |        | 23649           | POL2    |
| 2177           | FANCD2   | 7706                  | TRIM25   | 3980                     | LIG3     | 5395            | PMS2     | 3159                 | HMGAI1   | 5422                       | POLA1    | 10036                | CHAF1A    | 2068                       | ERC2     |               |        | 80351           | TNKS2   |
| 2178           | FANCE    | 9636                  | ISO15    | 353497                   | POLN     | 5378            | PMS1     | 10075                | HUWE1    | 27343                      | POLL     | 8208                 | CHAF1B    | 2071                       | ERC3     |               |        |                 |         |
| 2188           | FANCF    | 10459                 | MAD2L2   | 10721                    | POLQ     | 4595            | MUTHY    | 8930                 | MBD4     | 27343                      | POLM     | 1105                 | CHD1      | 2965                       | GTFC23   |               |        |                 |         |
| 2189           | FANGC    | 55666                 | NPL0C4   | 51659                    | GINS2    | 5111            | PCNA     | 4350                 | MPG      | 10721                      | POLQ     | 9557                 | CHD1L     | 2967                       | GTFC23   |               |        |                 |         |
| 55215          | FANCI    | 5111                  | PCNA     | 7979                     | SHFM1    | 5379            | PMS2P1   | 4595                 | MUTHY    | 5591                       | PRKDC    | 1106                 | CHD2      | 2968                       | GTFC24   |               |        |                 |         |
| 55120          | FANCL    | 25898                 | RCHY1    | 642636                   | RAD21L1  | 5380            | PMS2P2   | 79661                | NEIL1    | 7334                       | UBE2N    | 1107                 | CHD3      | 404672                     | GTFC25   |               |        |                 |         |
| 57697          | FANCM    | 51455                 | REV1     | 7334                     | UBE2N    | 5383            | PMS3P5   | 252969               | NEIL2    | 22992                      | KDM5A    | 1108                 | CHD4      | 9978                       | RBX1     |               |        |                 |         |
| 27033          | ZBTB32   | 5982                  | RF02     | 55218                    | EXO2     | 10535           | RNASEH2A | 55247                | NEIL3    | 8924                       | HERC2    | 26038                | CHD5      | 8451                       | CUL4A    |               |        |                 |         |
| 146956         | EME1     | 5983                  | RF03     | 2187                     | FANCB    | 6117            | HPA1     | 4913                 | NTHL1    | 8290                       | HIST3H3  | 84181                | CHD6      | 8450                       | CUL4B    |               |        |                 |         |
| 22909          | FAN1     | 5984                  | RF04     | 84893                    | FBXO18   | 6118            | HPA2     | 4968                 | ODG1     | 29086                      | BABAM1   | 55636                | CHD7      | 1642                       | DDB1     |               |        |                 |         |
| 80186          | MUS81    | 5985                  | RF05     | 2237                     | FEN1     | 6119            | HPA3     | 142                  | PARP1    | 3014                       | H2AFX    | 57680                | CHD8      | 10450                      | PP1A     |               |        |                 |         |
| 64710          | NUCKS1   | 5981                  | RF01     | 147872                   | CCDC155  | 6996            | TDG      | 10038                | PARP2    | 8359                       | HIST1H4A | 80205                | CHD9      | 64858                      | DLCLRE1B |               |        |                 |         |
| 10635          | RAD51AP1 | 6117                  | HPA1     | 348654                   | GEN1     | 11277           | TREX1    | 5111                 | PCNA     | 8366                       | HIST1H4B | 1487                 | CTBP1     | 1643                       | DBR2     |               |        |                 |         |
| 5892           | RAD51D   | 6118                  | HPA2     | 548593                   | SLX1A    | 25              | ABL1     | 5428                 | POLQ     | 8364                       | HIST1H4C | 10364                | CTCF      | 3978                       | LIG1     |               |        |                 |         |
| 165918         | RNF168   | 6119                  | HPA3     | 113510                   | HELO     | 7161            | TPT3     | 55170                | PRMT6    | 8360                       | HIST1H4D | 140590               | CTCF      | 3980                       | LIG3     |               |        |                 |         |
| 9025           | RNF8     | 7314                  | UBB      | 3364                     | HUS1     |                 |          | 6117                 | HPA1     | 8367                       | HIST1H4E | 30827                | CXXC1     | 3981                       | LIG4     |               |        |                 |         |
| 6117           | HPA1     | 7316                  | UBC      | 3014                     | H2AFX    |                 |          | 6118                 | HPA2     | 8361                       | HIST1H4F | 7913                 | DEK       | 5423                       | POLB     |               |        |                 |         |
| 6118           | HPA2     | 9246                  | UBE2L6   | 54617                    | NBR1     |                 |          | 6119                 | HPA3     | 8365                       | HIST1H4H | 55928                | DNAPI1    | 5424                       | POL1B    |               |        |                 |         |
| 6119           | HPA3     | 7318                  | UBA7     | 23514                    | SPDR     |                 |          | 9401                 | RECQL4   | 8294                       | HIST1H4I | 8193                 | DPF1      | 5425                       | POLD2    |               |        |                 |         |
| 5888           | RAD51    | 7353                  | UFD1L    | 9907                     | AP5Z1    |                 |          | 8034                 | SLC25A16 | 8368                       | HIST1H4L | 5977                 | DPF2      | 10714                      | POLD3    |               |        |                 |         |
| 9637           | DLCLRE1A | 9100                  | USP10    | 84515                    | MCMB     |                 |          | 23583                | SMUG1    | 2547                       | XRC6     | 8110                 | DPF3      | 57804                      | POLD4    |               |        |                 |         |
| 201254         | CENPA    | 124793                | USP43    | 254394                   | MCMB     |                 |          | 51548                | SIRT6    | 7520                       | XRC5     | 57634                | POL2      | 5426                       | POL4     |               |        |                 |         |
| 7314           | UBB      | 7415                  | VCP      | 286053                   | NSMCE2   |                 |          | 6996                 | TDG      | 4292                       | MLH1     | 2074                 | ERCC8     | 51426                      | POLK     |               |        |                 |         |
| 7316           | UBC      | 22890                 | ZBTB1    | 4361                     | MRE11    |                 |          | 7374                 | UNG      | 22976                      | PAXIP1   | 1647                 | GADD45A   | 27343                      | POLL     |               |        |                 |         |
| 9768           | UBE2T    | 9768                  | KIAA1011 | 23503                    | MRE11A   |                 |          | 10309                | CCND1    | 7336                       | UBE2V2   | 4616                 | GADD45B   | 7329                       | UBR2     |               |        |                 |         |
| 7398           | USP1     | 7335                  | UBE2V1   | 4683                     | NBN      |                 |          | 55031                | USP47    | 286053                     | NSMCE2   | 10912                | GADD45G   | 7334                       | UBE2N    |               |        |                 |         |
| 7507           | HPA1     | 7336                  | UBE2V2   | 10111                    | RAD50    |                 |          | 7486                 | WRN      | 4361                       | MRE11    | 3054                 | HCF1C     | 2067                       | ERC1C    |               |        |                 |         |
| 2072           | ERC04    | 27434                 | POLM     | 22909                    | FAN1     |                 |          | 7515                 | XRC1C    | 4683                       | NBN      | 3070                 | HELLS     | 2074                       | ERC06    |               |        |                 |         |
| 7517           | XRC03    | 10721                 | POLQ     | NSMCE1                   | MUS81    |                 |          | 200558               | APLF     | 10111                      | RAD50    | 6596                 | HLTF      | 267004                     | PTGES3   |               |        |                 |         |
| 80233          | FAAP100  | 55339                 | WOR33    | 64859                    | OBFC2A   |                 |          | 4521                 | NUDT1    | 9656                       | MDC1     | 10362                | HMG20B    | 1161                       | ERC08    |               |        |                 |         |
| 548593         | SLX1A    | 388988                | UBE2NL   | 4796                     | TONSIL   |                 |          | 143                  | PARP4    | 27339                      | PRPF19   | 54556                | MG3       | 2176                       | FANCC    |               |        |                 |         |
| 675            | BRCA2    |                       |          | 64710                    | NUCKS1   |                 |          | 25961                | NUDT13   | 10624                      | KAT5     | 54617                | NOB8      | 3150                       | HGMN1    |               |        |                 |         |
| 83990          | FANCI    |                       |          | 197370                   | NSMCE1   |                 |          |                      |          | 51588                      | PIAS4    | 83444                | INO80B    | 10463                      | SLC39A8  |               |        |                 |         |
| 79728          | PALB2    |                       |          | 220064                   | ORAOV1   |                 |          |                      |          | 51720                      | UIMC1    | 125476               | INO80C    | 3364                       | HUS1     |               |        |                 |         |
| 5889           | RAD51C   |                       |          | 79728                    | PALB2    |                 |          |                      |          | 55183                      | RF1      | 54891                | INO80D    | 57461                      | ISY1     |               |        |                 |         |
| 672            | BRCA1    |                       |          | 142                      | PARP1    |                 |          |                      |          | 165918                     | RNF168   | 28399                | INO80E    | 39122                      | RAB43    |               |        |                 |         |
| 5910           | RAD1     |                       |          | 10635                    | RAD51AP1 |                 |          |                      |          | 9025                       | RNF8     | 10524                | KAT5      | 57564                      | UVSSA    |               |        |                 |         |
|                |          |                       |          | 6421                     | SFPQ     |                 |          |                      |          | 6419                       | SETMAR   | 222229               | LRWD1     | 4287                       | ATXN3    |               |        |                 |         |
|                |          |                       |          | 5890                     | RAD51B   |                 |          |                      |          | 23137                      | SMC5     | 114785               | MBD6      | 64210                      | MM519    |               |        |                 |         |
|                |          |                       |          | 5889                     | RAD51C   |                 |          |                      |          | 9937                       | MTA1     | 9112                 | MTA1      | 7336                       | UBE2V2   |               |        |                 |         |
|                |          |                       |          | 5892                     | RAD51D   |                 |          |                      |          | 7341                       | SUMO1    | 57504                | MTA3      | 22909                      | FAN1     |               |        |                 |         |
|                |          |                       |          | 25788                    | RAD54B   |                 |          |                      |          | 7405                       | UVRAG    | 10514                | MYBBP1A   | 79661                      | NEIL1    |               |        |                 |         |
|                |          |                       |          | 8438                     | RAD54L   |                 |          |                      |          | 7468                       | WHSC1    | 4641                 | MYC1C     | 25269                      | NEIL2    |               |        |                 |         |
|                |          |                       |          | 5932                     | RBBP9    |                 |          |                      |          | 7518                       | XRC04    | 4678                 | NASP      | 55247                      | NEIL3    |               |        |                 |         |
|                |          |                       |          | 5965                     | RECQL    |                 |          |                      |          | 91419                      | ATP23    | 8467                 | SMARCA5   | 27339                      | PRPF19   |               |        |                 |         |
|                |          |                       |          | 51444                    | RNF138   |                 |          |                      |          | 7158                       | TP53BP1  | 56916                | SMARCA2D1 | 4913                       | NTHL1    |               |        |                 |         |
|                |          |                       |          | 6117                     | HPA1     |                 |          |                      |          | 5965                       | RECQL    | 50485                | SMARCA11  | 4968                       | ODG1     |               |        |                 |         |
|                |          |                       |          | 6118                     | HPA2     |                 |          |                      |          | 2072                       | ERC04    | 6599                 | SMARCC1   | 220064                     | ORAOV1   |               |        |                 |         |
|                |          |                       |          | 6119                     | HPA3     |                 |          |                      |          | 7486                       | WRN      | 6601                 | SMARCC2   | 142                        | PARP1    |               |        |                 |         |
|                |          |                       |          | 5888                     | RAD51    |                 |          |                      |          | 2139                       | EYAA2    | 6602                 | SMARCCD1  | 5111                       | PCNA     |               |        |                 |         |
|                |          |                       |          | 5893                     | RAD52    |                 |          |                      |          | 10432                      | RBM14    | 6603                 | SMARCCD2  | 5430                       | POLR2A   |               |        |                 |         |
|                |          |                       |          | 9400                     | RECQL5   |                 |          |                      |          | 28990                      | ASTE1    | 6604                 | SMARCCD3  | 5431                       | POLR2B   |               |        |                 |         |
|                |          |                       |          | 84296                    | GINS4    |                 |          |                      |          | 4841                       | NONO     | 6605                 | SMARCE1   | 5432                       | POLR2C   |               |        |                 |         |
|                |          |                       |          | 23137                    | SMC5     |                 |          |                      |          | 9232                       | PTTG1    | 10847                | SRCAP     | 5433                       | POLR2D   |               |        |                 |         |
|                |          |                       |          | 79677                    | SMC6     |                 |          |                      |          | 9126                       | SMC3     | 28844                | TEFT      | 5436                       | POLR2E   |               |        |                 |         |
|                |          |                       |          | 57599                    | WDR48    |                 |          |                      |          |                            |          | 7153                 | TOP2A     | 5438                       | POLR2I   |               |        |                 |         |
|                |          |                       |          | 2072                     | ERC04    |                 |          |                      |          |                            |          | 7155                 | TOP2B     | 5439                       | POLR2J   |               |        |                 |         |
|                |          |                       |          | 7515                     | XRC03    |                 |          |                      |          |                            |          | 7161                 | TPT3      | 5886                       | RAD23A   |               |        |                 |         |
|                |          |                       |          | 7516                     | XRC02    |                 |          |                      |          |                            |          | 6944                 | VP572     | 5887                       | RAD23B   |               |        |                 |         |
|                |          |                       |          | 7517                     | XRC03    |                 |          |                      |          |                            |          | 7528                 | YY1       | 5892                       | RAD51D   |               |        |                 |         |
|                |          |                       |          | 7528                     | YY1      |                 |          |                      |          |                            |          | 11244                | ZHX1      | 5932                       | RBBP8    |               |        |                 |         |
|                |          |                       |          | 23503                    | ZFYVE26  |                 |          |                      |          |                            |          | 10467                | ZNHIT1    | 5982                       | RF02     |               |        |                 |         |
|                |          |                       |          | 125150                   | ZSWIM7   |                 |          |                      |          |                            |          | 84083                | ZRANB3    | 5983                       | RF03     |               |        |                 |         |
|                |          |                       |          | 146956                   | EME1     |                 |          |                      |          |                            |          | 8607                 | RUVEL1    | 5984                       | RF04     |               |        |                 |         |
|                |          |                       |          | 197342                   | EME2     |                 |          |                      |          |                            |          | 10856                | RUVEL2    | 5985                       | RF05     |               |        |                 |         |
|                |          |                       |          | 2139                     | EYAA2    |                 |          |                      |          |                            |          | 26122                | EPCC2     | 5981                       | RF01     |               |        |                 |         |
|                |          |                       |          | 5810                     | RAD1     |                 |          |                      |          |                            |          | 23054                | NCOA6     | 5434                       | POLR2E   |               |        |                 |         |
|                |          |                       |          | 5884                     | RAD17    |                 |          |                      |          |                            |          | 29128                | UHRF1     | 5435                       | POLR2F   |               |        |                 |         |
|                |          |                       |          | 5891                     |          |                 |          |                      |          |                            |          |                      |           |                            |          |               |        |                 |         |

Table E2

Upregulated Genes in Severe COPD

| Up-Regulated Genes |                       |                    |                       |                    |                       |                    |                       |                 |  |
|--------------------|-----------------------|--------------------|-----------------------|--------------------|-----------------------|--------------------|-----------------------|-----------------|--|
| Lung eQTL          |                       |                    |                       | OSU                |                       | LGRC               |                       |                 |  |
| GOLD IV vs. GOLD 0 | GOLD IV vs. GOLD I,II | GOLD IV vs. GOLD 0 | GOLD IV vs. GOLD I,II | GOLD IV vs. GOLD 0 | GOLD IV vs. GOLD I,II | GOLD IV vs. GOLD 0 | GOLD IV vs. GOLD I,II | GOLD 4 vs. I,II |  |
| 84710              | 64710                 | 84126              | 84126                 | 7311               | 27033                 | 7311               | 27033                 | 27033           |  |
| 165916             | 7398                  | 353497             | 2067                  | 1325               | 80233                 | 1325               | 80233                 | 80233           |  |
| 7507               | 7507                  | 55215              | 27033                 | 27033              | 5425                  | 27033              | 5425                  | 5425            |  |
| 10933              | 6421                  | 80233              | 80233                 | 80233              | 10459                 | 80233              | 10459                 | 10459           |  |
| OBCF2A             | 7528                  | 2072               | 5425                  | 5425               | 9100                  | 5425               | 9100                  | 9100            |  |
| 6421               | 51444                 | 55031              | 80233                 | 10459              | 135458                | 10459              | 135458                | 135458          |  |
| 51444              | GADD45B               | 6601               | 5425                  | 7415               | 3980                  | 9100               | 3980                  | 3980            |  |
| 7528               |                       |                    | 10714                 | 7335               | 389898                | 641                | OBCF2A                | 3014            |  |
| 1017               |                       |                    | 5429                  | 27434              | 3980                  | 3980               | 197370                | 197370          |  |
| 8359               |                       |                    | 5566                  | 3980               | 7334                  | 7334               | 23049                 | 23049           |  |
| 571                |                       |                    | 472                   | 7334               | 7334                  | 3014               | 7166                  | 7166            |  |
| 2140               |                       |                    | 55317                 | 2237               | OBCF2A                | 25                 |                       |                 |  |
| 1105               |                       |                    | 84893                 | 84296              | 197370                | 2139               |                       |                 |  |
| 1106               |                       |                    | 3014                  | 25                 | 27301                 | 27301              | 7161                  | 7161            |  |
| GADD45A            |                       |                    | 9907                  | 328                | 27301                 | 27301              | 27301                 | 27301           |  |
| GADD45B            |                       |                    | 84515                 | 3159               | 23049                 | 23049              | 3159                  | 3159            |  |
| 10912              |                       |                    | 4361                  | 2547               | 7156                  | 6996               | 51548                 | 51548           |  |
| 6601               |                       |                    | OBCF2A                | 51588              | 6996                  | 7161               | 8359                  | 8359            |  |
|                    |                       |                    |                       | 9112               | 7161                  | 27301              | 8365                  | 8365            |  |
|                    |                       |                    |                       | 6421               | 7157                  | 3159               | 8294                  | 8294            |  |
|                    |                       |                    |                       | 84296              | 60                    | 51548              | 7341                  | 7341            |  |
|                    |                       |                    |                       | 151987             | 51412                 | 4521               | 10432                 | 10432           |  |
|                    |                       |                    |                       | 29072              | 8289                  | 5591               | 55127                 | 55127           |  |
|                    |                       |                    |                       | 25                 | 57680                 | 7341               | 22853                 | 22853           |  |
|                    |                       |                    |                       | 3146               | 1487                  | 9232               | 23476                 | 23476           |  |
|                    |                       |                    |                       | 3159               | 30827                 | 571                | 25855                 | 25855           |  |
|                    |                       |                    |                       | 8930               | 10514                 | 10519              | GADD45A               | GADD45A         |  |
|                    |                       |                    |                       | 27339              | 4641                  | 11200              | GADD45B               | GADD45B         |  |
|                    |                       |                    |                       | 51588              | 10847                 | 55127              | 10912                 | 10912           |  |
|                    |                       |                    |                       | 55183              | 10856                 | 51412              | 222229                | 222229          |  |
|                    |                       |                    |                       | 79913              | 2068                  | 22893              | 10514                 | 10514           |  |
|                    |                       |                    |                       | 9112               | 5430                  | 23476              | 6604                  | 6604            |  |
|                    |                       |                    |                       | 10039              | 5433                  | 25855              | 10847                 | 10847           |  |
|                    |                       |                    |                       | 113130             | 5439                  | 54891              | 10856                 | 10856           |  |
|                    |                       |                    |                       | 51412              | 5886                  | 54891              | 5433                  | 5433            |  |
|                    |                       |                    |                       | 10036              | 5434                  | 222229             | 4255                  | 4255            |  |
|                    |                       |                    |                       | 1106               | 56949                 | 10514              | 121642                | 121642          |  |
|                    |                       |                    |                       | 26038              | 10445                 | 8607               | 84164                 | 84164           |  |
|                    |                       |                    |                       | 57680              | 1736                  | 10856              | 7014                  | 7014            |  |
|                    |                       |                    |                       | 8193               |                       | 2068               | 1736                  | 1736            |  |
|                    |                       |                    |                       | GADD45A            |                       | 1642               |                       |                 |  |
|                    |                       |                    |                       | GADD45B            |                       | 5432               |                       |                 |  |
|                    |                       |                    |                       |                    |                       | 5433               |                       |                 |  |
|                    |                       |                    |                       |                    |                       | 4678               |                       |                 |  |
|                    |                       |                    |                       |                    |                       | 10856              |                       |                 |  |
|                    |                       |                    |                       |                    |                       | 2965               |                       |                 |  |
|                    |                       |                    |                       |                    |                       | 2968               |                       |                 |  |
|                    |                       |                    |                       |                    |                       | 9978               |                       |                 |  |
|                    |                       |                    |                       |                    |                       | 57461              |                       |                 |  |
|                    |                       |                    |                       |                    |                       | 339122             |                       |                 |  |
|                    |                       |                    |                       |                    |                       | MMS19              |                       |                 |  |
|                    |                       |                    |                       |                    |                       | 5432               |                       |                 |  |
|                    |                       |                    |                       |                    |                       | 5433               |                       |                 |  |
|                    |                       |                    |                       |                    |                       | 5439               |                       |                 |  |
|                    |                       |                    |                       |                    |                       | 5887               |                       |                 |  |
|                    |                       |                    |                       |                    |                       | 5434               |                       |                 |  |
|                    |                       |                    |                       |                    |                       | 5437               |                       |                 |  |
|                    |                       |                    |                       |                    |                       | 10973              |                       |                 |  |
|                    |                       |                    |                       |                    |                       | 84164              |                       |                 |  |

**Table E2 Differentially expressed genes.** Entrez IDs for differentially expressed genes in GOLD IV vs. GOLD 0 and GOLD IV vs. GOLD I, II in the Lung eQTL, LGRC, and OSU cohorts. For the 15 genes that were identified as differentially expressed across three cohorts, Entrez IDs have been replaced with gene symbols and color coded for easy identification.

Table E2 (cont) Downregulated Genes in Severe COPD

| Down-Regulated Genes |                    |                       |                    |                       |                    |                    |                       |                    |                       |
|----------------------|--------------------|-----------------------|--------------------|-----------------------|--------------------|--------------------|-----------------------|--------------------|-----------------------|
| Lung eQTL            |                    |                       | OSU                |                       |                    | LGR                |                       |                    |                       |
| GOLD IV vs. GOLD 0   | GOLD IV vs. GOLD 0 | GOLD IV vs. GOLD I,II | GOLD IV vs. GOLD 0 | GOLD IV vs. GOLD I,II | GOLD IV vs. GOLD 0 | GOLD IV vs. GOLD 0 | GOLD IV vs. GOLD I,II | GOLD IV vs. GOLD 0 | GOLD IV vs. GOLD I,II |
| FANCC                | 64789              | 64789                 | 64789              | 64789                 | 64710              | FANCC              | 64710                 | FANCC              | 64789                 |
| FANCL                | 2188               | 5888                  | 5888               | 5888                  | 9025               | FANCL              | 9025                  | FANCL              | 22909                 |
|                      | 10635              | 7706                  | FANCC              | 2175                  | 9937               |                    | 9937                  |                    | 10635                 |
|                      | 9025               | 22890                 |                    | 2188                  | 51426              |                    | 51426                 |                    | 7398                  |
|                      | 5888               | 8318                  | FANCL              | 57697                 | 51455              |                    | 51455                 |                    | 7507                  |
|                      | 79728              | 3364                  |                    | 6117                  | 5984               |                    | 5984                  |                    | 5889                  |
| POLI                 | 5810               | 220064                |                    | 22909                 | REF1               |                    | 253714                |                    | 672                   |
|                      | 51514              | 4439                  |                    | 5892                  | 113510             | POLI               | 201973                | POLI               | 201973                |
|                      | 7706               | 56247                 |                    | 9025                  | 84515              |                    | 5427                  |                    | 5427                  |
| REF1                 | 51455              | 8034                  |                    | 6117                  | 10111              |                    | 51514                 |                    | 51426                 |
|                      | 22890              | 64421                 |                    | 9937                  | 5985               |                    | 5985                  |                    | 5980                  |
|                      | 55339              | 22992                 |                    | 201254                | REF1               |                    | 7318                  |                    | 9636                  |
|                      | 10213              | 2140                  |                    | 7316                  | 79677              |                    | 124739                |                    | 5111                  |
|                      | 55218              | 51507                 |                    | 7507                  | 4436               |                    | 11144                 |                    | 51455                 |
|                      | 348654             | 9557                  |                    | 548593                | 5423               |                    | 55218                 |                    | 5984                  |
|                      | 254394             | 114785                |                    | 79728                 | 267004             |                    | 348654                |                    | 5985                  |
|                      | 220064             | 29844                 |                    | 5889                  | 3146               |                    | 23514                 | REF1               |                       |
|                      | 125150             | 7153                  |                    | 672                   | NUDT1              |                    | 254394                |                    | 7318                  |
|                      | 197342             | 10450                 |                    | 5424                  | 64421              |                    | 10111                 |                    | 22890                 |
|                      | 5884               | DDB2                  |                    | 10714                 | 84142              |                    | 220064                |                    | 119392                |
| NEIL1                | 5378               | 7329                  | POLI               | 57804                 | XRCC4              |                    | 5893                  |                    | 7579                  |
|                      | 8034               | MMS19                 |                    | 93973                 |                    | 91419              | 5893                  |                    | 348654                |
|                      | 143                |                       |                    | 7706                  | 28990              |                    | 79677                 |                    | 113510                |
| NUDT1                |                    |                       |                    | 5980                  | 9665               |                    | 23503                 |                    | 5984                  |
|                      | 64421              |                       |                    | 51455                 | 23064              |                    | 9126                  |                    | 23514                 |
| BRCC3                |                    |                       |                    | 5983                  | 8467               |                    | 29072                 |                    | 84515                 |
|                      | 3981               |                       |                    | 5984                  | 29028              |                    | 4436                  |                    | 254394                |
|                      | 22992              |                       |                    | 5985                  | 546                |                    | 5378                  |                    | 286053                |
| WHSC1                |                    |                       | REF1               |                       | 1105               |                    | 7508                  |                    | 10111                 |
| XRCC4                |                    |                       |                    | 124739                | 84181              | NEIL1              |                       |                    | 25788                 |
|                      | 2140               |                       |                    | 7415                  | 55636              |                    | 55247                 |                    | 5985                  |
|                      | 9112               |                       |                    | 7336                  | 80205              |                    | 4913                  |                    | 23137                 |
|                      | 51507              |                       |                    | 55339                 | 6596               |                    | 4968                  |                    | 79677                 |
|                      | 1106               |                       |                    | 253714                | 114785             |                    | 10038                 |                    | 23503                 |
|                      | 114785             |                       |                    | 11144                 | 7155               |                    | 55031                 |                    | 5884                  |
|                      | 7153               |                       |                    | 55218                 | 23054              | NUDT1              |                       |                    | 9126                  |
|                      | 6944               |                       |                    | 254394                | 54841              | BRCC3              |                       |                    | 4436                  |
|                      | 54778              |                       |                    | 4361                  | 404672             |                    | 5422                  |                    | 29072                 |
|                      | 91603              |                       | DDB2               | 10111                 |                    |                    | 8364                  |                    | 4436                  |
|                      | 10450              |                       |                    | 220064                | 10463              | WHSC1              |                       |                    | 5378                  |
| DDB2                 |                    |                       |                    | 25788                 | 4287               |                    | 28990                 |                    | 7508                  |
|                      | 57654              |                       | MMS19              | 5893                  |                    |                    | 83666                 |                    | 8930                  |
|                      | 85015              |                       |                    | 5893                  | 29935              |                    | 9665                  | NEIL1              |                       |
| OBFC1                | 93973              |                       |                    | 79677                 | 6512               |                    | 5883                  |                    | 4588                  |
|                      |                    |                       |                    | 57599                 |                    |                    | 11176                 |                    | 10038                 |
|                      |                    |                       |                    | 7515                  | OBFC1              |                    | 84181                 |                    | 55031                 |
|                      |                    |                       |                    | 7529                  |                    |                    | 10664                 |                    | 143                   |
|                      |                    |                       |                    | 23503                 |                    |                    | 6596                  | NUDT1              |                       |
|                      |                    |                       |                    | 2139                  |                    |                    | 6601                  | BRCC3              |                       |
|                      |                    |                       |                    | 1017                  |                    |                    | 6605                  |                    | 84142                 |
|                      |                    |                       |                    | 8243                  |                    |                    | 26122                 |                    | 3981                  |
|                      |                    |                       |                    | 9126                  |                    |                    | 23054                 | WHSC1              |                       |
|                      |                    |                       |                    | 9156                  |                    |                    | 54841                 | XRCC4              |                       |
|                      |                    |                       |                    | 4436                  |                    |                    | 2071                  |                    | 91419                 |
|                      |                    |                       |                    | 2956                  |                    |                    |                       |                    | 83666                 |
|                      |                    |                       |                    | 5378                  |                    | MMS19              | 2073                  |                    | 1653                  |
|                      |                    |                       |                    | 4595                  |                    |                    | 5037                  |                    | 157570                |
|                      |                    |                       |                    | 5383                  |                    |                    | 25842                 |                    | 9665                  |
|                      |                    |                       |                    | 10535                 |                    | OBFC1              |                       |                    | 5885                  |
|                      |                    |                       |                    | 11277                 |                    |                    | 5557                  |                    | 23064                 |
|                      |                    |                       |                    | 1753                  |                    |                    |                       |                    | 56916                 |
|                      |                    |                       |                    | 3148                  |                    |                    |                       |                    | 64431                 |
|                      |                    |                       |                    | 10075                 |                    |                    |                       |                    | 196528                |
|                      |                    |                       | NEIL1              |                       |                    |                    |                       |                    | 11176                 |
|                      |                    |                       |                    | 4913                  |                    |                    |                       |                    | 84181                 |
|                      |                    |                       |                    | 4968                  |                    |                    |                       |                    | 7913                  |
|                      |                    |                       |                    | 10038                 |                    |                    |                       |                    | 6596                  |
|                      |                    |                       |                    | 85170                 |                    |                    |                       |                    | 54555                 |
|                      |                    |                       |                    | 8034                  |                    |                    |                       |                    | 6605                  |
|                      |                    |                       |                    | 23583                 |                    |                    |                       |                    | 7155                  |
|                      |                    |                       |                    | 7374                  |                    |                    |                       |                    | 26122                 |
|                      |                    |                       |                    | 55031                 |                    |                    |                       |                    | 6594                  |
|                      |                    |                       |                    | 7486                  |                    |                    |                       |                    | 54841                 |
|                      |                    |                       | NUDT1              |                       |                    |                    |                       |                    | 1022                  |
|                      |                    |                       |                    | 64421                 |                    |                    |                       |                    | 404672                |
|                      |                    |                       | BRCC3              |                       |                    |                    |                       |                    | 3150                  |
|                      |                    |                       |                    | 580                   |                    |                    |                       |                    | 10463                 |
|                      |                    |                       |                    | 286257                |                    |                    |                       |                    |                       |
|                      |                    |                       |                    | 84142                 |                    |                    |                       |                    |                       |
|                      |                    |                       |                    | 5422                  |                    |                    |                       |                    |                       |
|                      |                    |                       |                    | 5591                  |                    |                    |                       |                    |                       |
|                      |                    |                       |                    | 8924                  |                    |                    |                       |                    |                       |
|                      |                    |                       |                    | 8366                  |                    |                    |                       |                    |                       |
|                      |                    |                       |                    | 8364                  |                    |                    |                       |                    |                       |
|                      |                    |                       |                    | 8360                  |                    |                    |                       |                    |                       |
|                      |                    |                       |                    | 8368                  |                    |                    |                       |                    |                       |
|                      |                    |                       |                    | 2547                  |                    |                    |                       |                    |                       |
|                      |                    |                       |                    | 22976                 |                    |                    |                       |                    |                       |
|                      |                    |                       |                    | 9656                  |                    |                    |                       |                    |                       |
|                      |                    |                       |                    | 6419                  |                    |                    |                       |                    |                       |
|                      |                    |                       |                    | 7405                  |                    |                    |                       |                    |                       |
|                      |                    |                       | WHSC1              |                       |                    |                    |                       |                    |                       |
|                      |                    |                       | XRCC4              |                       |                    |                    |                       |                    |                       |
|                      |                    |                       |                    | 91419                 |                    |                    |                       |                    |                       |
|                      |                    |                       |                    | 7158                  |                    |                    |                       |                    |                       |
|                      |                    |                       |                    | 28990                 |                    |                    |                       |                    |                       |
|                      |                    |                       |                    | 4841                  |                    |                    |                       |                    |                       |
|                      |                    |                       |                    | 83666                 |                    |                    |                       |                    |                       |
|                      |                    |                       |                    | 1653                  |                    |                    |                       |                    |                       |
|                      |                    |                       |                    | 9665                  |                    |                    |                       |                    |                       |
|                      |                    |                       |                    | 9112                  |                    |                    |                       |                    |                       |
|                      |                    |                       |                    | 5885                  |                    |                    |                       |                    |                       |
|                      |                    |                       |                    | 23064                 |                    |                    |                       |                    |                       |
|                      |                    |                       |                    | 56916                 |                    |                    |                       |                    |                       |
|                      |                    |                       |                    | 6647                  |                    |                    |                       |                    |                       |
|                      |                    |                       |                    | 5883                  |                    |                    |                       |                    |                       |
|                      |                    |                       |                    | 60                    |                    |                    |                       |                    |                       |
|                      |                    |                       |                    | 86                    |                    |                    |                       |                    |                       |
|                      |                    |                       |                    | 64431                 |                    |                    |                       |                    |                       |
|                      |                    |                       |                    | 196528                |                    |                    |                       |                    |                       |
|                      |                    |                       |                    | 29028                 |                    |                    |                       |                    |                       |
|                      |                    |                       |                    | 546                   |                    |                    |                       |                    |                       |
|                      |                    |                       |                    | 22893                 |                    |                    |                       |                    |                       |
|                      |                    |                       |                    | 2186                  |                    |                    |                       |                    |                       |
|                      |                    |                       |                    | 8208                  |                    |                    |                       |                    |                       |
|                      |                    |                       |                    | 9557                  |                    |                    |                       |                    |                       |
|                      |                    |                       |                    | 1108                  |                    |                    |                       |                    |                       |
|                      |                    |                       |                    | 84181                 |                    |                    |                       |                    |                       |
|                      |                    |                       |                    | 80205                 |                    |                    |                       |                    |                       |
|                      |                    |                       |                    | 1487                  |                    |                    |                       |                    |                       |
|                      |                    |                       |                    | 10664                 |                    |                    |                       |                    |                       |
|                      |                    |                       |                    | 55929                 |                    |                    |                       |                    |                       |
|                      |                    |                       |                    | 8110                  |                    |                    |                       |                    |                       |
|                      |                    |                       |                    | 57634                 |                    |                    |                       |                    |                       |
|                      |                    |                       |                    | 6596                  |                    |                    |                       |                    |                       |
|                      |                    |                       |                    | 10362                 |                    |                    |                       |                    |                       |
|                      |                    |                       |                    | 54556                 |                    |                    |                       |                    |                       |
|                      |                    |                       |                    | 114785                |                    |                    |                       |                    |                       |
|                      |                    |                       |                    | 4641                  |                    |                    |                       |                    |                       |
|                      |                    |                       |                    | 6601                  |                    |                    |                       |                    |                       |
|                      |                    |                       |                    | 6604                  |                    |                    |                       |                    |                       |
|                      |                    |                       |                    | 6605                  |                    |                    |                       |                    |                       |
|                      |                    |                       |                    | 7155                  |                    |                    |                       |                    |                       |
|                      |                    |                       |                    | 11244                 |                    |                    |                       |                    |                       |
|                      |                    |                       |                    | 84083                 |                    |                    |                       |                    |                       |
|                      |                    |                       |                    | 23054                 |                    |                    |                       |                    |                       |
|                      |                    |                       |                    | 6594                  |                    |                    |                       |                    |                       |
|                      |                    |                       |                    | 9716                  |                    |                    |                       |                    |                       |
|                      |                    |                       |                    | 54778                 |                    |                    |                       |                    |                       |
|                      |                    |                       |                    | 54841                 |                    |                    |                       |                    |                       |
|                      |                    |                       |                    | 1022                  |                    |                    |                       |                    |                       |
|                      |                    |                       |                    | 2068                  |                    |                    |                       |                    |                       |
|                      |                    |                       |                    | 404672                |                    |                    |                       |                    |                       |
|                      |                    |                       |                    | 8451                  |                    |                    |                       |                    |                       |
|                      |                    |                       | DDB2               |                       |                    |                    |                       |                    |                       |
|                      |                    |                       |                    | 1161                  |                    |                    |                       |                    |                       |
|                      |                    |                       |                    | 3150                  |                    |                    |                       |                    |                       |
|                      |                    |                       | MMS19              |                       |                    |                    |                       |                    |                       |
|                      |                    |                       |                    | 10463                 |                    |                    |                       |                    |                       |
|                      |                    |                       |                    | 5430                  |                    |                    |                       |                    |                       |
|                      |                    |                       |                    | 5436                  |                    |                    |                       |                    |                       |
|                      |                    |                       |                    | 5887                  |                    |                    |                       |                    |                       |
|                      |                    |                       |                    | 5435                  |                    |                    |                       |                    |                       |
|                      |                    |                       |                    | 5440                  |                    |                    |                       |                    |                       |
|                      |                    |                       |                    | 29935                 |                    |                    |                       |                    |                       |
|                      |                    |                       |                    | 6613                  |                    |                    |                       |                    |                       |
|                      |                    |                       |                    | 6917                  |                    |                    |                       |                    |                       |
|                      |                    |                       |                    | 2073                  |                    |                    |                       |                    |                       |
|                      |                    |                       |                    | 25842                 |                    |                    |                       |                    |                       |
|                      |                    |                       |                    | 221120                |                    |                    |                       |                    |                       |
|                      |                    |                       |                    | 10973                 |                    |                    |                       |                    |                       |
|                      |                    |                       |                    | 79068                 |                    |                    |                       |                    |                       |
|                      |                    |                       |                    | 80119                 |                    |                    |                       |                    |                       |
|                      |                    |                       | OBFC1              |                       |                    |                    |                       |                    |                       |
|                      |                    |                       |                    | 54386                 |                    |                    |                       |                    |                       |
|                      |                    |                       |                    | 10728                 |                    |                    |                       |                    |                       |
|                      |                    |                       |                    | 5558                  |                    |                    |                       |                    |                       |
|                      |                    |                       |                    | 5557                  |                    |                    |                       |                    |                       |
|                      |                    |                       |                    | 23649                 |                    |                    |                       |                    |                       |

Table E3

|                              | <b>GOLD 0</b> | <b>GOLD I, II</b> | <b>GOLD IV</b> |
|------------------------------|---------------|-------------------|----------------|
| <b>n</b>                     | 20            | 14                | 23             |
| <b>Age (years)</b>           | 62.7±9.8      | 70.0±10.3         | 54.2±6.9       |
| <b>Male Gender</b>           | 11 (55)       | 10 (71.4)         | 16 (69.2)      |
| <b>Pack-years</b>            | 30±23 [4]     | 50±23             | 54±7           |
| <b>Smoking Status (n)</b>    | [2]           | [2]               |                |
| <b>Current</b>               | 1             | 2                 | 0              |
| <b>Former</b>                | 15            | 10                | 22             |
| <b>Never</b>                 | 2             | 0                 | 1              |
| <b>Coexisting Malignancy</b> | 19 (95)       | 13 (93)           | 0 (0)          |

**Table E3 Demographic characteristics of lung tissue samples used for RNAseq.** Data are expressed as n (%) or mean ± standard deviation unless otherwise stated [] represents missing samples.

Table E4

|                       | Cluster 1  | Cluster 2 | Cluster 3 | p-value |
|-----------------------|------------|-----------|-----------|---------|
| n                     | 65         | 32        | 72        |         |
| Age (years)           | 66.2 ±10.1 | 65.2± 8.3 | 64.9±9.8  | 0.72    |
| Male Gender           | 38 (58.4)  | 18 (56.3) | 39 (54.2) | 0.88    |
| Pack-years            | 60±35      | 50±31     | 54±38     | 0.28    |
| Smoking Status (n)    |            |           |           | 0.98    |
| Current               | 5          | 2         | 4         |         |
| Former                | 58         | 29        | 65        |         |
| Never                 | 2          | 1         | 3         |         |
| Coexisting Malignancy | 48 (73.8)  | 14 (43.8) | 35 (48.6) | 0.003   |

**Table E4 Demographic characteristics of patient clusters.**  
Data are expressed as n (%) or mean ± standard deviation unless otherwise stated.

# Table E5

| Cluster 3 vs. Control | PATHWAYS                                                                   | FDR         |
|-----------------------|----------------------------------------------------------------------------|-------------|
|                       | Immune response_IL-5 signaling via JAK/STAT                                | 2.58416E-14 |
|                       | Development_PEDF signaling                                                 | 1.74796E-08 |
|                       | Renal tubulointerstitial injury in Lupus Nephritis                         | 1.74796E-08 |
|                       | Immune response_IL-17 signaling pathways                                   | 1.74796E-08 |
|                       | Immune response_IL-3 signaling via JAK/STAT, p38, JNK and NF-kB            | 1.74796E-08 |
|                       | Signal transduction_NF-kB activation pathways                              | 1.74796E-08 |
|                       | Immune response_IL-10 signaling pathway                                    | 2.43031E-08 |
|                       | Immune response_HSP60 and HSP70/ TLR signaling pathway                     | 4.70008E-08 |
|                       | Th17 cells in CF                                                           | 2.98976E-07 |
|                       | Apoptosis and survival_Anti-apoptotic TNFs/NF-kB/Bcl-2 pathway             | 8.5043E-07  |
|                       | Neurogenesis_NGF/ TrkA MAPK-mediated signaling                             | 9.74958E-07 |
|                       | Cell adhesion_ECM remodeling                                               | 1.04107E-06 |
|                       | Immune response_TLR2 and TLR4 signaling pathways                           | 4.58091E-06 |
|                       | Development_Regulation of epithelial-to-mesenchymal transition (EMT)       | 4.91049E-06 |
|                       | Myeloid-derived suppressor cells and M2 macrophages in cancer              | 4.91049E-06 |
|                       | Immune response_HMGB1/RAGE signaling pathway                               | 4.91049E-06 |
|                       | T follicular helper cell dysfunction in SLE                                | 6.89479E-06 |
|                       | Apoptosis and survival_APRIL and BAFF signaling                            | 7.88042E-06 |
|                       | Transcription_Role of VDR in regulation of genes involved in osteoporosis  | 8.35924E-06 |
|                       | Rheumatoid arthritis (general schema)                                      | 8.35924E-06 |
|                       | PDE4 regulation of cyto/chemokine expression in inflammatory skin diseases | 8.35924E-06 |
|                       | Immune response_Oncostatin M signaling via JAK-Stat                        | 1.19474E-05 |
|                       | Role of B cells in SLE                                                     | 1.60612E-05 |
|                       | Immune response_Oncostatin M signaling via MAPK                            | 1.93912E-05 |
|                       | Immune response_IL-6 signaling pathway via JAK/STAT                        | 2.52669E-05 |
|                       | Glomerular injury in Lupus Nephritis                                       | 2.86506E-05 |
|                       | Development_ERBB-family signaling                                          | 3.64516E-05 |
|                       | Immune response_OX40L/ OX40 signaling pathway                              | 4.92197E-05 |
|                       | Immune response_B cell antigen receptor (BCR) pathway                      | 5.87773E-05 |
|                       | Immune response_Role of HMGB1 in dendritic cell maturation and migration   | 7.06489E-05 |
|                       | Dysregulation of germinal center response in SLE                           | 7.61744E-05 |
|                       | Apoptosis and survival_Lymphotoxin-beta receptor signaling                 | 8.41162E-05 |
|                       | Expression targets of Tissue factor signaling in cancer                    | 8.41162E-05 |
|                       | Stimulation of TGF-beta signaling in lung cancer                           | 9.00069E-05 |
|                       | Immune response_IL-18 signaling                                            | 9.01493E-05 |
|                       | Signal transduction_PTMs in BAFF-induced non-canonical NF-kB signaling     | 9.40188E-05 |
|                       | Th17 cells in CF (mouse model)                                             | 0.000102011 |
|                       | PDE4 regulation of cyto/chemokine expression in arthritis                  | 0.000102011 |
|                       | Immune response_Bacterial infections in normal airways                     | 0.000102011 |
|                       | Role and regulation of Prostaglandin E2 in gastric cancer                  | 0.000102011 |
|                       | Immune response_MIF-mediated glucocorticoid regulation                     | 0.000111028 |
|                       | Immune response_TNF-R2 signaling pathways                                  | 0.000159031 |
|                       | Immune response_PGE2 signaling in immune response                          | 0.000159031 |
|                       | Colorectal cancer (general schema)                                         | 0.000250931 |
|                       | Cell adhesion_Chemokines and adhesion                                      | 0.000267804 |
|                       | Immune response_IL-6-induced acute-phase response in hepatocytes           | 0.000300058 |
|                       | Immune response_ICOS signaling pathway in T-helper cell                    | 0.000301549 |
|                       | PGE2 pathways in cancer                                                    | 0.000402922 |
|                       | Apoptosis and survival_Anti-apoptotic TNFs/NF-kB/IAP pathway               | 0.00050595  |
|                       | Immune response_Role of PKR in stress-induced antiviral cell response      | 0.000614013 |

Table E5 cont.

|                       | PATHWAYS                                                                                           | FDR         |
|-----------------------|----------------------------------------------------------------------------------------------------|-------------|
| Cluster 2 vs. Control | Cytoskeleton remodeling_TGF, WNT and cytoskeletal remodeling                                       | 1.85677E-06 |
|                       | Cytoskeleton remodeling_Cytoskeleton remodeling                                                    | 2.62659E-05 |
|                       | Cell adhesion_Integrin inside-out signaling in T cells                                             | 6.659E-05   |
|                       | Immune response_CCL2 signaling                                                                     | 6.659E-05   |
|                       | Cell adhesion_Histamine H1 receptor signaling in the interruption of cell barrier integrity        | 6.91542E-05 |
|                       | Immune response_Classical complement pathway                                                       | 0.000141904 |
|                       | Immune response_Alternative complement pathway                                                     | 0.000141904 |
|                       | Cell adhesion_Plasmin signaling                                                                    | 0.000206069 |
|                       | FGF signaling in pancreatic cancer                                                                 | 0.000303336 |
|                       | Development_MAG-dependent inhibition of neurite outgrowth                                          | 0.000360669 |
|                       | Immune response_C3a signaling                                                                      | 0.000466874 |
|                       | Cell adhesion_Chemokines and adhesion                                                              | 0.000466874 |
|                       | Renal tubulointerstitial injury in Lupus Nephritis                                                 | 0.000476109 |
|                       | Signal transduction_IP3 signaling                                                                  | 0.000476109 |
|                       | Immune response_CCR3 signaling in eosinophils                                                      | 0.000476109 |
|                       | Colorectal cancer (general schema)                                                                 | 0.000549706 |
|                       | Immune response_Lectin induced complement pathway                                                  | 0.000549706 |
|                       | Alternative complement cascade disruption in age-related macular degeneration                      | 0.000747639 |
|                       | Development_Regulation of cytoskeleton proteins in oligodendrocyte differentiation and myelination | 0.000968822 |
|                       | Cytoskeleton remodeling_Regulation of actin cytoskeleton by Rho GTPases                            | 0.001015361 |
|                       | Cell adhesion_ECM remodeling                                                                       | 0.001015361 |
|                       | Dysregulation of germinal center response in SLE                                                   | 0.001085358 |
|                       | Muscle contraction_GPCRs in the regulation of smooth muscle tone                                   | 0.001085358 |
|                       | Complement pathway disruption in thrombotic microangiopathy                                        | 0.001605382 |
|                       | Cytoskeleton remodeling_Substance P mediated membrane blebbing                                     | 0.001637494 |
|                       | Airway smooth muscle contraction in asthma                                                         | 0.001652474 |
|                       | Impaired inhibitory action of lipoxins on neutrophil migration in CF                               | 0.001652474 |
|                       | B cell signaling in hematological malignancies                                                     | 0.001652474 |
|                       | Immune response_T cell subsets: secreted signals                                                   | 0.001726088 |
|                       | Development_Regulation of epithelial-to-mesenchymal transition (EMT)                               | 0.002397985 |
|                       | Cell adhesion_Endothelial cell contacts by junctional mechanisms                                   | 0.002397985 |
|                       | Apoptosis and survival_NGF/ TrkA PI3K-mediated signaling                                           | 0.002637393 |
|                       | Chemotaxis_Inhibitory action of lipoxins on IL-8- and Leukotriene B4-induced neutrophil migration  | 0.002637393 |
|                       | Muscle contraction_Regulation of eNOS activity in endothelial cells                                | 0.002642032 |
|                       | Immune response_B cell antigen receptor (BCR) pathway                                              | 0.002642032 |
|                       | Cell adhesion_Tight junctions                                                                      | 0.002649148 |
|                       | G-protein signaling_H-RAS regulation pathway                                                       | 0.002649148 |
|                       | Muscle contraction_Relaxin signaling pathway                                                       | 0.002649148 |
|                       | Neurophysiological process_ACM regulation of nerve impulse                                         | 0.002649148 |
|                       | Cell cycle_Role of Nek in cell cycle regulation                                                    | 0.00271413  |
|                       | Cell adhesion_Gap junctions                                                                        | 0.007040667 |
|                       | Resolution of inflammation in healing myocardial infarction                                        | 0.007040667 |
|                       | Development_Regulation of lung epithelial progenitor cell differentiation                          | 0.007040667 |
|                       | Oxidative stress_Activation of NADPH oxidase                                                       | 0.007231906 |
|                       | ENaC regulation in normal and CF airways                                                           | 0.007231906 |
|                       | Glomerular injury in Lupus Nephritis                                                               | 0.007746357 |
|                       | Cytoskeleton remodeling_Reverse signaling by Ephrin-B                                              | 0.008199773 |
|                       | Chemotaxis_CCR1 signaling                                                                          | 0.008199773 |
|                       | Stimulation of TGF-beta signaling in lung cancer                                                   | 0.008199773 |
|                       | Development_Role of G-CSF in hematopoietic stem cell mobilization                                  | 0.008331283 |

# Table E5 cont.

|                       | PATHWAYS                                                                                 | FDR         |
|-----------------------|------------------------------------------------------------------------------------------|-------------|
| Cluster 1 vs. Control | Immune response_IL-5 signaling via JAK/STAT                                              | 2.46432E-08 |
|                       | Neurogenesis_NGF/ TrkA MAPK-mediated signaling                                           | 1.80016E-05 |
|                       | Immune response_IL-6 signaling pathway via JAK/STAT                                      | 2.26837E-05 |
|                       | Immune response_IL-3 signaling via JAK/STAT, p38, JNK and NF-kB                          | 2.26837E-05 |
|                       | Immune response_IL-18 signaling                                                          | 3.16719E-05 |
|                       | Development_Transcription regulation of granulocyte development                          | 3.93554E-05 |
|                       | Immune response_IL-1 signaling pathway                                                   | 8.65083E-05 |
|                       | Reproduction_Gonadotropin-releasing hormone (GnRH) signaling                             | 9.73401E-05 |
|                       | Immune response_IL-17 signaling pathways                                                 | 0.000206079 |
|                       | K-RAS signaling in pancreatic cancer                                                     | 0.000230174 |
|                       | Immune response_CD40 signaling                                                           | 0.000311612 |
|                       | Immune response_TLR2 and TLR4 signaling pathways                                         | 0.000427075 |
|                       | Development_GM-CSF signaling                                                             | 0.000427075 |
|                       | Immune response_HSP60 and HSP70/ TLR signaling pathway                                   | 0.00066774  |
|                       | Immune response_Oncostatin M signaling via MAPK                                          | 0.000681542 |
|                       | Immune response_MIF-mediated glucocorticoid regulation                                   | 0.000733887 |
|                       | Immune response_TLR5, TLR7, TLR8 and TLR9 signaling pathways                             | 0.000777029 |
|                       | Development_ERBB-family signaling                                                        | 0.000777029 |
|                       | Immune response_IL-33 signaling pathway                                                  | 0.000793299 |
|                       | Immune response_IL-10 signaling pathway                                                  | 0.00117069  |
|                       | Immune response_Substance P-stimulated expression of proinflammatory cytokines via MAPKs | 0.00118276  |
|                       | Renal tubulointerstitial injury in Lupus Nephritis                                       | 0.001449424 |
|                       | Glomerular injury in Lupus Nephritis                                                     | 0.001933506 |
|                       | Stimulation of TGF-beta signaling in lung cancer                                         | 0.001954887 |
|                       | Development_PEDF signaling                                                               | 0.00211156  |
|                       | Development_EGFR signaling pathway                                                       | 0.002168513 |
|                       | Immune response_CCL2 signaling                                                           | 0.003388931 |
|                       | Immune response_Platelet activating factor/ PTAFR pathway signaling                      | 0.003496915 |
|                       | PGE2 pathways in cancer                                                                  | 0.003496915 |
|                       | Immune response_IL-9 signaling pathway                                                   | 0.003617684 |
|                       | Development_YAP/TAZ-mediated co-regulation of transcription                              | 0.003617684 |
|                       | Transcription_Role of AP-1 in regulation of cellular metabolism                          | 0.00454154  |
|                       | IGF family signaling in colorectal cancer                                                | 0.004981025 |
|                       | Immune response_Oncostatin M signaling via JAK-Stat                                      | 0.005028124 |
|                       | Myeloid-derived suppressor cells and M2 macrophages in cancer                            | 0.006685753 |
|                       | Immune response_IL-27 signaling pathway                                                  | 0.006698825 |
|                       | T follicular helper cell dysfunction in SLE                                              | 0.006698825 |
|                       | Muscle contraction_Regulation of eNOS activity in endothelial cells                      | 0.006698825 |
|                       | Development_Leptin signaling via JAK/STAT and MAPK cascades                              | 0.007129372 |
|                       | Transcription_Transcription regulation of aminoacid metabolism                           | 0.007129372 |
|                       | Development_Cross-talk between VEGF and Angiopoietin 1 signaling pathways                | 0.008122061 |
|                       | Immune response_MIF-induced cell adhesion, migration and angiogenesis                    | 0.008557024 |
|                       | Development_TGF-beta-dependent induction of EMT via MAPK                                 | 0.009237917 |
|                       | Immune response_Histamine H1 receptor signaling in immune response                       | 0.009953739 |
|                       | Immune response_CD137 signaling in immune cell                                           | 0.011248497 |
|                       | Development_TGF-beta receptor signaling                                                  | 0.011248497 |
|                       | Immune response_C5a signaling                                                            | 0.011248497 |
|                       | Development_G-CSF-induced myeloid differentiation                                        | 0.011964976 |
|                       | Immune response_IL-5 signaling via PI3K, MAPK and NF-kB                                  | 0.011964976 |
|                       | Signal transduction_Additional pathways of NF-kB activation (in the cytoplasm)           | 0.012653182 |

**Table E5 Global gene expression pathways.** Analysis of global gene expression pathways associated with Clusters 1, 2, and 3 compared to control patients. The top 50 enriched pathways are listed for each comparison.



Table E6

(A)

|                                                            | BER  |       | CR   |       | DR   |       | FA    |       | HR   |       | MMR  |       | NER   |       | NHEJ |       | TR    |       | TLS    |       |
|------------------------------------------------------------|------|-------|------|-------|------|-------|-------|-------|------|-------|------|-------|-------|-------|------|-------|-------|-------|--------|-------|
|                                                            | FDR  | NES   | FDR  | NES   | FDR  | NES   | FDR   | NES   | FDR  | NES   | FDR  | NES   | FDR   | NES   | FDR  | NES   | FDR   | NES   | FDR    | NES   |
| FEV1 Percent Predicted                                     | 0.14 | 1.28  | 0.31 | 1.09  | 0.18 | -1.2  | 0.076 | 1.51  | 0.13 | 1.37  | 0.15 | 1.26  | 0.003 | 1.95  | 0.12 | 1.33  | 0.14  | 1.33  | 0.005  | 1.84  |
| DLCO Percent Predicted                                     | 0.57 | 0.25  | 0.15 | 1.31  | 0.02 | -1.61 | 0.042 | 1.62  | 0.18 | 1.26  | 0.2  | 1.22  | 0.048 | 1.57  | 0.55 | 0.23  | 0.15  | -1.4  | 0.02   | 1.73  |
| BODE                                                       | 0.28 | -1.11 | 0.23 | -1.17 | 0.11 | 1.27  | 0.08  | -1.43 | 0.06 | -1.5  | 0.08 | -1.4  | 0.006 | -1.86 | 0.08 | -1.38 | 0.045 | -1.56 | 0.011  | -1.88 |
| SF-12 Score                                                | 0.37 | 1.13  | 0.64 | 0.65  | 0.38 | -1.04 | 0.021 | 1.66  | 0.1  | 1.41  | 0.23 | 1.25  | 0.021 | 1.66  | 0.48 | 1.01  | 0.35  | 1.11  | 0.0045 | 1.92  |
| SGRQ Score                                                 | 0.67 | -0.88 | 0.21 | -1.23 | 0.22 | 1.16  | 0.058 | -1.61 | 0.23 | -1.24 | 0.5  | -1    | 0.058 | -1.61 | 0.39 | -1.08 | 0.15  | -1.34 | 0.092  | -1.64 |
| 6MWD (meters)                                              | 0.16 | 1.26  | 0.25 | 1.13  | 0.17 | -1.21 | 0.08  | 1.58  | 0.04 | 1.36  | 0.25 | 1.15  | 0.06  | 1.56  | 0.14 | 1.33  | 0.14  | 1.29  | 0.03   | 1.78  |
| Percent Emphysema                                          | 0.13 | -1.33 | 0.38 | -1.04 | 0.04 | 1.44  | 0.017 | -1.77 | 0.12 | -1.34 | 0.36 | -1.08 | 0.03  | -1.67 | 0.13 | -1.36 | 0.12  | -1.39 | 0.019  | -1.85 |
| Correlation with Features of Decreased COPD severity (FDR) |      |       |      |       |      |       |       |       |      |       |      |       |       |       |      |       |       |       |        |       |
| <0.01                                                      |      |       |      |       |      |       |       |       |      |       |      |       |       |       |      |       |       |       |        |       |
| ≥0.01 & <0.05                                              |      |       |      |       |      |       |       |       |      |       |      |       |       |       |      |       |       |       |        |       |
| ≥0.05 & <0.1                                               |      |       |      |       |      |       |       |       |      |       |      |       |       |       |      |       |       |       |        |       |
| Not Significant                                            |      |       |      |       |      |       |       |       |      |       |      |       |       |       |      |       |       |       |        |       |
| ≥0.05 & <0.1                                               |      |       |      |       |      |       |       |       |      |       |      |       |       |       |      |       |       |       |        |       |
| ≥0.01 & <0.05                                              |      |       |      |       |      |       |       |       |      |       |      |       |       |       |      |       |       |       |        |       |
| Correlation with Features of Increased COPD severity (FDR) |      |       |      |       |      |       |       |       |      |       |      |       |       |       |      |       |       |       |        |       |

(B)

|                                                                 | BER     |        | CR      |        | DR      |        | FA      |        | HR      |        | MMR     |        | NER     |        | NHEJ    |        | TR      |        | TLS     |        |
|-----------------------------------------------------------------|---------|--------|---------|--------|---------|--------|---------|--------|---------|--------|---------|--------|---------|--------|---------|--------|---------|--------|---------|--------|
|                                                                 | p-value | $\rho$ | p-value | $\rho$ | p-value | $\rho$ | p-value | $\rho$ | p-value | $\rho$ | p-value | $\rho$ | p-value | $\rho$ | p-value | $\rho$ | p-value | $\rho$ | p-value | $\rho$ |
| FEV1 Percent Predicted                                          | 0.402   | 0.14   | 0.888   | 0.02   | 0.151   | -0.13  | 0.020   | 0.20   | 0.056   | 0.17   | 0.044   | 0.18   | <0.001  | 0.37   | 0.015   | 0.21   | 0.578   | 0.06   | <0.001  | 0.33   |
| DLCO Percent Predicted                                          | 0.523   | 0.08   | 0.543   | 0.12   | 0.017   | -0.23  | 0.020   | 0.22   | 0.079   | 0.15   | 0.036   | 0.20   | <0.001  | 0.38   | 0.135   | 0.13   | 0.204   | 0.13   | <0.001  | 0.42   |
| BODE                                                            | 0.484   | -0.11  | 0.888   | -0.04  | 0.152   | 0.12   | 0.020   | -0.20  | 0.052   | -0.21  | 0.036   | -0.20  | <0.001  | -0.38  | 0.015   | -0.23  | 0.117   | -0.16  | <0.001  | -0.37  |
| SF-12 Score                                                     | 0.580   | 0.06   | 0.888   | -0.04  | 0.221   | -0.10  | 0.013   | 0.23   | 0.052   | 0.18   | 0.053   | 0.17   | <0.001  | 0.32   | 0.104   | 0.13   | 0.094   | 0.18   | <0.001  | 0.32   |
| SGRQ Score                                                      | 0.826   | 0.02   | 0.888   | 0.01   | 0.006   | 0.26   | 0.020   | -0.19  | 0.056   | -0.16  | 0.122   | -0.12  | <0.001  | -0.32  | 0.046   | -0.17  | 0.094   | -0.19  | <0.001  | -0.31  |
| 6MWD(meters)                                                    | 0.523   | 0.08   | 0.888   | -0.02  | 0.120   | -0.16  | 0.020   | 0.20   | 0.056   | 0.17   | 0.111   | 0.14   | 0.002   | 0.25   | 0.015   | 0.22   | 0.117   | 0.16   | 0.001   | 0.28   |
| Percent Emphysema                                               | 0.343   | -0.16  | 0.543   | -0.09  | 0.017   | 0.21   | 0.002   | -0.28  | 0.052   | -0.18  | 0.036   | -0.20  | <0.001  | -0.37  | 0.015   | -0.21  | 0.312   | -0.10  | <0.001  | -0.37  |
| Correlation with Features of Decreased COPD severity ( $\rho$ ) |         |        |         |        |         |        |         |        |         |        |         |        |         |        |         |        |         |        |         |        |
| ≥0.30                                                           |         |        |         |        |         |        |         |        |         |        |         |        |         |        |         |        |         |        |         |        |
| ≥0.20 & <0.30                                                   |         |        |         |        |         |        |         |        |         |        |         |        |         |        |         |        |         |        |         |        |
| <0.20                                                           |         |        |         |        |         |        |         |        |         |        |         |        |         |        |         |        |         |        |         |        |
| Not Significant                                                 |         |        |         |        |         |        |         |        |         |        |         |        |         |        |         |        |         |        |         |        |
| <0.20                                                           |         |        |         |        |         |        |         |        |         |        |         |        |         |        |         |        |         |        |         |        |
| ≥0.20 & <0.30                                                   |         |        |         |        |         |        |         |        |         |        |         |        |         |        |         |        |         |        |         |        |
| Correlation with Features of Increased COPD severity ( $\rho$ ) |         |        |         |        |         |        |         |        |         |        |         |        |         |        |         |        |         |        |         |        |

**Table E6 Enrichment analysis.** DNA repair pathways associated with markers of COPD severity based on **A)** GSEA (Normalized Enrichment Score (NES) and FDR) and **B)** Z-score (Correlation Coefficient ( $\rho$ ) and p-value). *Definition of abbreviations:* FEV<sub>1</sub> – Forced expiratory volume in one second, DLCO - diffusing capacity of the lungs for carbon monoxide, SGRQ - St. George's Respiratory Questionnaire, BODE - body mass index, airflow obstruction, dyspnea, and exercise capacity, and SF-12 - Short Form Healthy Survey-12, BER - Base excision repair, CR - Chromatin remodeling, DR - Direct repair, FA - Fanconi anemia, HR - Homologous recombination, MMR - Mismatch repair, NER - Nucleotide excision repair, NHEJ - Non-homologous end joining, TR - telomere repair, TLS - Translesion synthesis pathway. 6-minute walk distance – (6MWD)

Table E7

| Yellow                                                             | FDR      |
|--------------------------------------------------------------------|----------|
| DNA damage_BER-NER repair                                          | 7.42E-03 |
| Transcription_Chromatin modification                               | 1.64E-02 |
| DNA damage_DBS repair                                              | 1.88E-02 |
| Salmon                                                             |          |
| Development_Regulation of angiogenesis                             | 1.68E-03 |
| Transcription_Chromatin modification                               | 8.39E-02 |
| Light Yellow                                                       |          |
| Cell adhesion_Amyloid proteins                                     | 5.31E-04 |
| Cell adhesion_Cadherins                                            | 9.48E-03 |
| Development_Neurogenesis_Synaptogenesis                            | 3.72E-02 |
| Cell adhesion_Cell junctions                                       | 3.87E-02 |
| Signal transduction_WNT signaling                                  |          |
| Green                                                              |          |
| Translation_Translation initiation                                 | 1.92E-02 |
| Sky Blue                                                           |          |
| Cell adhesion_Integrin-mediated cell-matrix adhesion               | 5.79E-02 |
| Turquoise                                                          |          |
| Inflammation_IL-6 signaling                                        | 8.32E-05 |
| Cytoskeleton_Intermediate filaments                                | 1.73E-04 |
| Inflammation_Amphoterin signaling                                  | 2.35E-04 |
| Apoptosis_Apoptotic nucleus                                        | 2.35E-04 |
| Inflammation_Protein C signaling                                   | 4.86E-04 |
| Cell cycle_G1-S Interleukin regulation                             | 6.16E-04 |
| Inflammation_Histamine signaling                                   | 6.16E-04 |
| Development_Ossification and bone remodeling                       | 6.16E-04 |
| Apoptosis_Death Domain receptors & caspases in apoptosis           | 6.68E-04 |
| Immune response_TCR signaling                                      | 1.13E-03 |
| Immune response_Th17-derived cytokines                             | 1.93E-03 |
| Cell adhesion_Platelet-endothelium-leucocyte interactions          | 2.37E-03 |
| Inflammation_IgE signaling                                         | 2.37E-03 |
| Inflammation_Neutrophil activation                                 | 2.37E-03 |
| Inflammation_MIF signaling                                         | 2.87E-03 |
| Inflammation_IL-2 signaling                                        | 2.87E-03 |
| Inflammation_IL-10 anti-inflammatory response                      | 2.87E-03 |
| Cardiac development_Role of NADPH oxidase and ROS                  | 3.43E-03 |
| Inflammation_TREM1 signaling                                       | 3.79E-03 |
| Inflammation_Inflammasome                                          | 4.10E-03 |
| Immune response_Innate immune response to RNA viral infection      | 4.93E-03 |
| Reproduction_Feeding and Neurohormone signaling                    | 5.13E-03 |
| Inflammation_Innate inflammatory response                          | 5.14E-03 |
| Cell cycle_G1-S Growth factor regulation                           | 7.22E-03 |
| Immune response_BCR pathway                                        | 8.43E-03 |
| Chemotaxis                                                         | 9.71E-03 |
| Apoptosis_Apoptotic mitochondria                                   | 1.46E-02 |
| Apoptosis_Anti-Apoptosis mediated by external signals via PI3K/AKT | 1.95E-02 |
| Cell cycle_G1-S                                                    | 2.63E-02 |
| Inflammation_NK cell cytotoxicity                                  | 2.73E-02 |
| Inflammation_IL-4 signaling                                        | 3.22E-02 |
| Inflammation_IL-12,15,18 signaling                                 | 3.66E-02 |

**Table E7 Pathway enrichment for weighted gene co-expression network modules (WGCNA).** The enriched processes associated with the WGCNA modules most closely associated with clinical indices of COPD severity (FDR <0.05).

Table E8

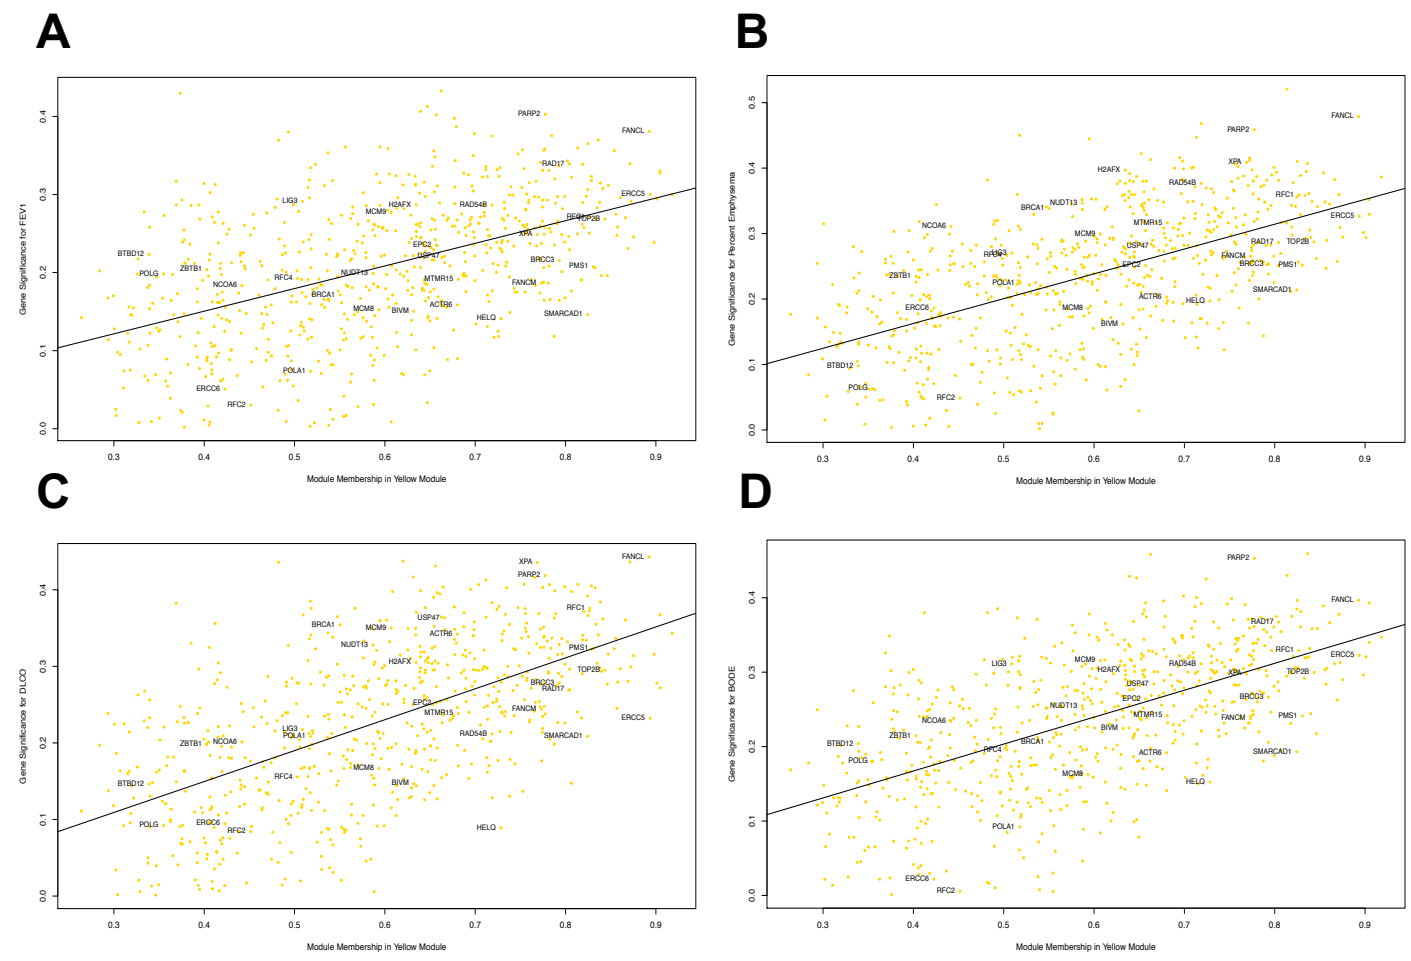

**Figure E8 Gene significance (GS) versus module membership (MM) for the Yellow module.** Weighted gene co-expression network analysis (WGCNA) derived MM were plotted against GS for the following traits: **A)** FEV<sub>1</sub> percent predicted **B)** percent emphysema **C)** DLCO percent predicted, and **D)** BODE index. All DDRT genes (**Supplemental Table 1**) within the module are identified.
